# Supplementary material for: Theoretical investigations on the structure–property relationships of Au13and AuxM13−xnanoclusters
Source: Royal Society of Chemistry journal article supplement (doi:10.1039/c7ra08421h), 2017-01-01
Supplement: c7ra08421h1.pdf [file c7ra08421h1.pdf]

## *Supporting Information*

### **Theoretical investigations on the structure-property relationships of Au<sub>13</sub> and Au<sub>x</sub>M<sub>13-x</sub> nanoclusters**

Ying Lv, Xi Kang, Sha Yang, Tao Chen, Ao Liu, Haizhu Yu\* and Manzhou Zhu\*

<sup>a</sup> Department of Chemistry and Center for Atomic Engineering of Advanced Materials, Anhui Province  
Key Laboratory of Chemistry for Inorganic/Organic Hybrid Functionalized Materials, Anhui  
University, Hefei, Anhui 230601, China.

Emails: yuhaizhu@ahu.edu.cn; zmz@ahu.edu.cn (M.Z.)

### **Table of Contents**

|                                                            |            |
|------------------------------------------------------------|------------|
| <b>Cartesian coordinates of optimized structures .....</b> | <b>S2</b>  |
| <b>Figure S1 .....</b>                                     | <b>S24</b> |
| <b>Table S1 .....</b>                                      | <b>S24</b> |

## Cartesian coordinates of optimized structures calculated at PBE/TZP level

[Au<sub>9</sub>Ag<sub>4</sub>(PPh<sub>2</sub>Me)<sub>8</sub>Cl<sub>4</sub>]<sup>+</sup> (-1398.97040560 eV)

|    |              |              |              |
|----|--------------|--------------|--------------|
| Au | 27.240963000 | 5.194708000  | -1.318941000 |
| Au | 24.883680000 | 3.419612000  | -1.329625000 |
| Au | 25.856201000 | 0.621040000  | -1.104264000 |
| Au | 28.827804000 | 0.803253000  | -1.004047000 |
| Au | 28.423434000 | 4.974279000  | 1.389247000  |
| Au | 24.740337000 | 2.046843000  | 1.294298000  |
| Au | 29.515564000 | 2.133045000  | 1.536890000  |
| Au | 27.034740000 | 2.834616000  | 2.918029000  |
| Au | 27.181942000 | 2.792279000  | 0.125253000  |
| Ag | 27.380940000 | 2.636542000  | -2.714285000 |
| Ag | 29.668014000 | 3.637910000  | -0.963142000 |
| Ag | 25.541842000 | 4.877971000  | 1.169169000  |
| Ag | 27.207996000 | 0.255445000  | 1.430356000  |
| P  | 27.586990000 | 7.119243000  | -2.613890000 |
| P  | 22.986143000 | 4.194385000  | -2.474330000 |
| P  | 25.148262000 | -1.471846000 | -1.913553000 |
| P  | 30.369882000 | -0.395065000 | -2.296759000 |
| P  | 29.023027000 | 7.070834000  | 2.273084000  |
| P  | 22.721464000 | 1.375369000  | 2.294788000  |
| P  | 31.614337000 | 1.672472000  | 2.475265000  |
| P  | 27.060721000 | 2.859531000  | 5.263008000  |
| Cl | 27.733607000 | 2.235966000  | -5.062203000 |
| Cl | 31.951865000 | 4.163509000  | -1.502399000 |
| Cl | 24.372708000 | 6.823489000  | 2.020418000  |
| Cl | 27.033377000 | -2.044547000 | 2.156136000  |
| C  | 27.203588000 | 6.916344000  | -4.394695000 |
| C  | 27.906713000 | 5.942317000  | -5.124404000 |
| C  | 27.658687000 | 5.774595000  | -6.487137000 |
| C  | 26.701279000 | 6.564081000  | -7.130068000 |
| C  | 25.980337000 | 7.514788000  | -6.403109000 |
| C  | 26.226273000 | 7.692293000  | -5.039303000 |
| C  | 26.702219000 | 8.633819000  | -2.086836000 |
| C  | 25.641238000 | 8.527996000  | -1.175495000 |
| C  | 24.946252000 | 9.669140000  | -0.764702000 |
| C  | 25.305939000 | 10.923047000 | -1.263201000 |
| C  | 26.367464000 | 11.038024000 | -2.168387000 |
| C  | 27.063812000 | 9.900917000  | -2.581261000 |
| C  | 29.372419000 | 7.557731000  | -2.592568000 |
| C  | 21.424421000 | 3.338243000  | -2.037580000 |
| C  | 21.052024000 | 2.170610000  | -2.727790000 |

|   |              |              |              |
|---|--------------|--------------|--------------|
| C | 19.880209000 | 1.494602000  | -2.383619000 |
| C | 19.073106000 | 1.966564000  | -1.342722000 |
| C | 19.446866000 | 3.116239000  | -0.642157000 |
| C | 20.617205000 | 3.799534000  | -0.984407000 |
| C | 23.043425000 | 4.136630000  | -4.303364000 |
| C | 24.216442000 | 3.730938000  | -4.953119000 |
| C | 24.276022000 | 3.711992000  | -6.349701000 |
| C | 23.165277000 | 4.098730000  | -7.101661000 |
| C | 21.990365000 | 4.506990000  | -6.457989000 |
| C | 21.925650000 | 4.525949000  | -5.064806000 |
| C | 22.684135000 | 5.963099000  | -2.078182000 |
| C | 24.789453000 | -1.549509000 | -3.708701000 |
| C | 24.911037000 | -0.396395000 | -4.495611000 |
| C | 24.659513000 | -0.452512000 | -5.869971000 |
| C | 24.285797000 | -1.659515000 | -6.463579000 |
| C | 24.168545000 | -2.816760000 | -5.683574000 |
| C | 24.419195000 | -2.765049000 | -4.312609000 |
| C | 23.665772000 | -2.211673000 | -1.122132000 |
| C | 22.398033000 | -2.076315000 | -1.713366000 |
| C | 21.276242000 | -2.654327000 | -1.115872000 |
| C | 21.405507000 | -3.369854000 | 0.078186000  |
| C | 22.661194000 | -3.490813000 | 0.680710000  |
| C | 23.789147000 | -2.910233000 | 0.093234000  |
| C | 26.464796000 | -2.712748000 | -1.622369000 |
| C | 29.688371000 | -1.673013000 | -3.424241000 |
| C | 29.983897000 | -3.036007000 | -3.257784000 |
| C | 29.446199000 | -3.980652000 | -4.136327000 |
| C | 28.614314000 | -3.574432000 | -5.182691000 |
| C | 28.314211000 | -2.218399000 | -5.346193000 |
| C | 28.841192000 | -1.266362000 | -4.471722000 |
| C | 31.637427000 | -1.269134000 | -1.308513000 |
| C | 31.259433000 | -1.839497000 | -0.080778000 |
| C | 32.191163000 | -2.548807000 | 0.680876000  |
| C | 33.507052000 | -2.685670000 | 0.229239000  |
| C | 33.891215000 | -2.113672000 | -0.987233000 |
| C | 32.961286000 | -1.411073000 | -1.757656000 |
| C | 31.240801000 | 0.770043000  | -3.408170000 |
| C | 30.695577000 | 7.687030000  | 1.844057000  |
| C | 31.465380000 | 6.985561000  | 0.905324000  |
| C | 32.705872000 | 7.485426000  | 0.496162000  |
| C | 33.188071000 | 8.682114000  | 1.030626000  |
| C | 32.425634000 | 9.385421000  | 1.971539000  |
| C | 31.182757000 | 8.895640000  | 2.374969000  |
| C | 28.851604000 | 7.283672000  | 4.087300000  |

|   |              |              |             |
|---|--------------|--------------|-------------|
| C | 27.576239000 | 7.517235000  | 4.636169000 |
| C | 27.428403000 | 7.685643000  | 6.015341000 |
| C | 28.541463000 | 7.619477000  | 6.858831000 |
| C | 29.805495000 | 7.362690000  | 6.319615000 |
| C | 29.962155000 | 7.187957000  | 4.942416000 |
| C | 27.902024000 | 8.361248000  | 1.602904000 |
| C | 21.566266000 | 2.721943000  | 2.756921000 |
| C | 20.282848000 | 2.427331000  | 3.253667000 |
| C | 19.395650000 | 3.460813000  | 3.557481000 |
| C | 19.778566000 | 4.795384000  | 3.371330000 |
| C | 21.054054000 | 5.093106000  | 2.887086000 |
| C | 21.944261000 | 4.058813000  | 2.582099000 |
| C | 22.904394000 | 0.354328000  | 3.807006000 |
| C | 22.679073000 | 0.889290000  | 5.085951000 |
| C | 22.819222000 | 0.080757000  | 6.216711000 |
| C | 23.190636000 | -1.259437000 | 6.084889000 |
| C | 23.444878000 | -1.787483000 | 4.815510000 |
| C | 23.311740000 | -0.985703000 | 3.681434000 |
| C | 21.738548000 | 0.325390000  | 1.156016000 |
| C | 32.274449000 | 2.984475000  | 3.574197000 |
| C | 32.777008000 | 4.165403000  | 2.999467000 |
| C | 33.283628000 | 5.181363000  | 3.812508000 |
| C | 33.285971000 | 5.035809000  | 5.203415000 |
| C | 32.767199000 | 3.873213000  | 5.780401000 |
| C | 32.259865000 | 2.851736000  | 4.972672000 |
| C | 31.721163000 | 0.118689000  | 3.439624000 |
| C | 32.944257000 | -0.313743000 | 3.984370000 |
| C | 33.014085000 | -1.527879000 | 4.668646000 |
| C | 31.869431000 | -2.322153000 | 4.811729000 |
| C | 30.653531000 | -1.898319000 | 4.271568000 |
| C | 30.578814000 | -0.679378000 | 3.591205000 |
| C | 32.886457000 | 1.510720000  | 1.162890000 |
| C | 27.352562000 | 1.225591000  | 6.036250000 |
| C | 26.909792000 | 0.075043000  | 5.365683000 |
| C | 27.129282000 | -1.190596000 | 5.912211000 |
| C | 27.786680000 | -1.319265000 | 7.137870000 |
| C | 28.231689000 | -0.178720000 | 7.814117000 |
| C | 28.020932000 | 1.088796000  | 7.266584000 |
| C | 25.539151000 | 3.543657000  | 6.030946000 |
| C | 24.828472000 | 4.537969000  | 5.339946000 |
| C | 23.699297000 | 5.123613000  | 5.916199000 |
| C | 23.266740000 | 4.716136000  | 7.181305000 |
| C | 23.967493000 | 3.720942000  | 7.870327000 |
| C | 25.099627000 | 3.133958000  | 7.300050000 |

|   |              |              |              |
|---|--------------|--------------|--------------|
| C | 28.390603000 | 3.943592000  | 5.907625000  |
| H | 28.637333000 | 5.294078000  | -4.636487000 |
| H | 28.207935000 | 5.008214000  | -7.036463000 |
| H | 26.510685000 | 6.432434000  | -8.197080000 |
| H | 25.224298000 | 8.127858000  | -6.897815000 |
| H | 25.664734000 | 8.444085000  | -4.482837000 |
| H | 25.372788000 | 7.556086000  | -0.754500000 |
| H | 24.136566000 | 9.566237000  | -0.039701000 |
| H | 24.765864000 | 11.815942000 | -0.942006000 |
| H | 26.653777000 | 12.017599000 | -2.556439000 |
| H | 27.882903000 | 10.005193000 | -3.295552000 |
| H | 29.580905000 | 8.399405000  | -3.266315000 |
| H | 29.958665000 | 6.683742000  | -2.906788000 |
| H | 29.667567000 | 7.813588000  | -1.566246000 |
| H | 21.668774000 | 1.802550000  | -3.550368000 |
| H | 19.590236000 | 0.600275000  | -2.938907000 |
| H | 18.153150000 | 1.440290000  | -1.080888000 |
| H | 18.827662000 | 3.488804000  | 0.176019000  |
| H | 20.891959000 | 4.693543000  | -0.422905000 |
| H | 25.095167000 | 3.428907000  | -4.378632000 |
| H | 25.202652000 | 3.396380000  | -6.832719000 |
| H | 23.209661000 | 4.084058000  | -8.192856000 |
| H | 21.119933000 | 4.808979000  | -7.043961000 |
| H | 21.000113000 | 4.831395000  | -4.571599000 |
| H | 21.730699000 | 6.307710000  | -2.501290000 |
| H | 23.509116000 | 6.542330000  | -2.513230000 |
| H | 22.696801000 | 6.114428000  | -0.990285000 |
| H | 25.225385000 | 0.545114000  | -4.040087000 |
| H | 24.767282000 | 0.452484000  | -6.470528000 |
| H | 24.087040000 | -1.704289000 | -7.536505000 |
| H | 23.878833000 | -3.762534000 | -6.145940000 |
| H | 24.316209000 | -3.671411000 | -3.711871000 |
| H | 22.290941000 | -1.535547000 | -2.655436000 |
| H | 20.298488000 | -2.554365000 | -1.591935000 |
| H | 20.530246000 | -3.834401000 | 0.536829000  |
| H | 22.768341000 | -4.047892000 | 1.613914000  |
| H | 24.759470000 | -2.998567000 | 0.589521000  |
| H | 26.127025000 | -3.714557000 | -1.920733000 |
| H | 27.340257000 | -2.423480000 | -2.217207000 |
| H | 26.737966000 | -2.703510000 | -0.556595000 |
| H | 30.637919000 | -3.363067000 | -2.448207000 |
| H | 29.686753000 | -5.037365000 | -4.003262000 |
| H | 28.199149000 | -4.313844000 | -5.870657000 |
| H | 27.661132000 | -1.892704000 | -6.158237000 |

|   |              |              |              |
|---|--------------|--------------|--------------|
| H | 28.582808000 | -0.211839000 | -4.612370000 |
| H | 30.235541000 | -1.720540000 | 0.283886000  |
| H | 31.888143000 | -2.982478000 | 1.635431000  |
| H | 34.236288000 | -3.234960000 | 0.828167000  |
| H | 34.918533000 | -2.216861000 | -1.342007000 |
| H | 33.275207000 | -0.974011000 | -2.706546000 |
| H | 31.960352000 | 0.244965000  | -4.050377000 |
| H | 30.481411000 | 1.252878000  | -4.040521000 |
| H | 31.737387000 | 1.548931000  | -2.810784000 |
| H | 31.106186000 | 6.045444000  | 0.478052000  |
| H | 33.282504000 | 6.925683000  | -0.243301000 |
| H | 34.157498000 | 9.073041000  | 0.714290000  |
| H | 32.798622000 | 10.322853000 | 2.389608000  |
| H | 30.596056000 | 9.452643000  | 3.108863000  |
| H | 26.692322000 | 7.564174000  | 3.995380000  |
| H | 26.435617000 | 7.872618000  | 6.429060000  |
| H | 28.422827000 | 7.765240000  | 7.934245000  |
| H | 30.678642000 | 7.301901000  | 6.972542000  |
| H | 30.953330000 | 6.985941000  | 4.533371000  |
| H | 28.117557000 | 9.331629000  | 2.070683000  |
| H | 28.064720000 | 8.431249000  | 0.520462000  |
| H | 26.854068000 | 8.076735000  | 1.776185000  |
| H | 19.975763000 | 1.391731000  | 3.414977000  |
| H | 18.402648000 | 3.224752000  | 3.945581000  |
| H | 19.080370000 | 5.600317000  | 3.611128000  |
| H | 21.379111000 | 6.126179000  | 2.745652000  |
| H | 22.939895000 | 4.307349000  | 2.208404000  |
| H | 22.384258000 | 1.933346000  | 5.202934000  |
| H | 22.632796000 | 0.504308000  | 7.205461000  |
| H | 23.291129000 | -1.889547000 | 6.970696000  |
| H | 23.756449000 | -2.827816000 | 4.703680000  |
| H | 23.536349000 | -1.409253000 | 2.701416000  |
| H | 20.816195000 | -0.021961000 | 1.640040000  |
| H | 21.490516000 | 0.921207000  | 0.268077000  |
| H | 22.336340000 | -0.539103000 | 0.844235000  |
| H | 32.778994000 | 4.296650000  | 1.915082000  |
| H | 33.680862000 | 6.088408000  | 3.351706000  |
| H | 33.697632000 | 5.824849000  | 5.836208000  |
| H | 32.769114000 | 3.751869000  | 6.865704000  |
| H | 31.875131000 | 1.938848000  | 5.431610000  |
| H | 33.842974000 | 0.298473000  | 3.881711000  |
| H | 33.965570000 | -1.856022000 | 5.092175000  |
| H | 31.930374000 | -3.272580000 | 5.346200000  |
| H | 29.753833000 | -2.509267000 | 4.365300000  |

|   |              |              |             |
|---|--------------|--------------|-------------|
| H | 29.625238000 | -0.359392000 | 3.164374000 |
| H | 33.890380000 | 1.427133000  | 1.600423000 |
| H | 32.830950000 | 2.378664000  | 0.488981000 |
| H | 32.656555000 | 0.607469000  | 0.582985000 |
| H | 26.408299000 | 0.159081000  | 4.398925000 |
| H | 26.799068000 | -2.069216000 | 5.355434000 |
| H | 27.963334000 | -2.308903000 | 7.564382000 |
| H | 28.751518000 | -0.274362000 | 8.769690000 |
| H | 28.384980000 | 1.965652000  | 7.804260000 |
| H | 25.146478000 | 4.856850000  | 4.343568000 |
| H | 23.157033000 | 5.892350000  | 5.362259000 |
| H | 22.380493000 | 5.170024000  | 7.630005000 |
| H | 23.631116000 | 3.398025000  | 8.858099000 |
| H | 25.632243000 | 2.348753000  | 7.840178000 |
| H | 28.357096000 | 4.011008000  | 7.003145000 |
| H | 28.239743000 | 4.945894000  | 5.490081000 |
| H | 29.366713000 | 3.563227000  | 5.577969000 |

[Au<sub>9</sub>Cu<sub>4</sub>(PPh<sub>2</sub>Me)<sub>8</sub>Cl<sub>4</sub>]<sup>+</sup> (-1403.39989663 eV)

|    |              |              |              |
|----|--------------|--------------|--------------|
| Cu | 2.796383270  | -0.482579330 | 0.925152610  |
| Cu | 2.397969670  | 1.790222110  | -0.455784470 |
| Au | 2.363071530  | -0.578958160 | -1.824425170 |
| Au | 1.131407730  | -2.531286070 | -0.011266390 |
| Au | 0.581282270  | -1.064728970 | 2.574152360  |
| Au | 1.549053780  | 1.673704710  | 2.149780360  |
| Au | 0.381573620  | 1.498525080  | -2.422349080 |
| Cu | -0.396933580 | -1.124648010 | -2.022902850 |
| Au | -1.652147710 | -1.589647930 | 0.558024100  |
| Cu | -1.201705880 | 0.961039210  | 1.896348290  |
| Au | -0.165776590 | 2.890009910  | 0.129059680  |
| Au | -2.087759360 | 0.859287490  | -0.897861990 |
| Au | 0.421016970  | 0.157425040  | 0.062621820  |
| Cl | 4.733989880  | -1.088358110 | 1.646240590  |
| Cl | 4.039622890  | 3.112088080  | -0.921956300 |
| P  | 4.151362200  | -1.229005260 | -3.181852650 |
| P  | 1.636741830  | -4.818067780 | 0.051496450  |
| P  | 0.582692770  | -1.580198150 | 4.862844110  |
| P  | 2.767164170  | 3.011191240  | 3.642693400  |
| P  | 0.388396920  | 2.364961920  | -4.602325190 |
| Cl | -1.047079060 | -2.084791790 | -3.859860010 |
| P  | -3.436253040 | -3.049730370 | 0.999276990  |
| Cl | -2.380387110 | 1.593991150  | 3.607921850  |
| P  | -4.273952830 | 1.502491500  | -1.469041170 |
| P  | -0.622461180 | 5.185653840  | -0.004023380 |

|   |              |              |              |
|---|--------------|--------------|--------------|
| C | 3.958900420  | -2.879067850 | -3.946908130 |
| C | 5.055572630  | -3.722461500 | -4.189288790 |
| C | 4.869414360  | -4.945259570 | -4.838358800 |
| C | 3.592503030  | -5.333127710 | -5.254388390 |
| C | 2.497059990  | -4.500665940 | -5.008258030 |
| C | 2.674961160  | -3.280468490 | -4.352753890 |
| C | 4.541421100  | -0.105887350 | -4.582048680 |
| C | 4.648827030  | -0.577082550 | -5.900414320 |
| C | 4.988513980  | 0.301713930  | -6.932957590 |
| C | 5.225788750  | 1.650422380  | -6.657728520 |
| C | 5.109921510  | 2.124132810  | -5.346784220 |
| C | 4.760649860  | 1.256849880  | -4.310105250 |
| C | 5.702262860  | -1.254999010 | -2.204630250 |
| C | 0.570722150  | -5.870619650 | -1.003655560 |
| C | 0.397668570  | -7.243887520 | -0.754863750 |
| C | -0.411786280 | -8.013149150 | -1.593521570 |
| C | -1.059424190 | -7.420973620 | -2.682958160 |
| C | -0.895379600 | -6.055759220 | -2.930962520 |
| C | -0.084389770 | -5.282967900 | -2.096361320 |
| C | 3.371877540  | -5.259224200 | -0.362417020 |
| C | 3.698312970  | -6.360316460 | -1.168814760 |
| C | 5.037926480  | -6.697573250 | -1.383214410 |
| C | 6.057565970  | -5.941681710 | -0.799411680 |
| C | 5.735226600  | -4.832329000 | -0.010770760 |
| C | 4.399722640  | -4.484768880 | 0.203452370  |
| C | 1.440058200  | -5.482868110 | 1.754528920  |
| C | 2.038537360  | -2.504715240 | 5.482458470  |
| C | 3.045550030  | -2.883284360 | 4.583048360  |
| C | 4.186876910  | -3.547170000 | 5.043493120  |
| C | 4.328767320  | -3.836660010 | 6.402337380  |
| C | 3.333484900  | -3.449232810 | 7.307344720  |
| C | 2.194518140  | -2.783682270 | 6.852749730  |
| C | -0.897683500 | -2.440277050 | 5.533552910  |
| C | -0.847845100 | -3.738617800 | 6.066174790  |
| C | -1.998164260 | -4.321893990 | 6.606591470  |
| C | -3.207615700 | -3.623051470 | 6.611669660  |
| C | -3.265845210 | -2.336827350 | 6.065019590  |
| C | -2.122553880 | -1.745566120 | 5.523743890  |
| C | 0.580328690  | -0.015420230 | 5.823396440  |
| C | 3.541424050  | 2.130207770  | 5.058133420  |
| C | 3.423528620  | 2.590396700  | 6.379578930  |
| C | 4.058524690  | 1.904059090  | 7.418813390  |
| C | 4.814047820  | 0.760563480  | 7.147834580  |
| C | 4.929058720  | 0.298078940  | 5.832966470  |



|   |              |              |              |
|---|--------------|--------------|--------------|
| C | 4.293578320  | 0.972457110  | 4.788915340  |
| C | 1.815658960  | 4.381748990  | 4.394517320  |
| C | 2.426531310  | 5.586783550  | 4.779959980  |
| C | 1.677971240  | 6.582297200  | 5.412094490  |
| C | 0.318212150  | 6.382795960  | 5.668055180  |
| C | -0.296535540 | 5.189798920  | 5.277531240  |
| C | 0.444860620  | 4.193590000  | 4.638109550  |
| C | 4.207728390  | 3.758686950  | 2.791343150  |
| C | -1.223722790 | 3.020147820  | -5.187355690 |
| C | -1.479087080 | 4.402282190  | -5.204603310 |
| C | -2.721468220 | 4.885568670  | -5.622578220 |
| C | -3.721783680 | 3.996689590  | -6.026043540 |
| C | -3.477069620 | 2.620844740  | -6.001771330 |
| C | -2.239245770 | 2.131402590  | -5.579154930 |
| C | 1.570407020  | 3.720240210  | -4.956914680 |
| C | 1.692250690  | 4.240431980  | -6.258544340 |
| C | 2.597258620  | 5.269837430  | -6.518725000 |
| C | 3.386088520  | 5.790454690  | -5.485130860 |
| C | 3.273689990  | 5.271373450  | -4.194034660 |
| C | 2.369667260  | 4.237070350  | -3.929154520 |
| C | 0.813976510  | 1.034981610  | -5.795115920 |
| C | -2.987548840 | -4.730372950 | 1.600279570  |
| C | -3.169124420 | -5.868163930 | 0.797854320  |
| C | -2.831240140 | -7.133819470 | 1.283886550  |
| C | -2.308599690 | -7.278674710 | 2.570725470  |
| C | -2.113269790 | -6.147399480 | 3.368905380  |
| C | -2.441473760 | -4.878499970 | 2.887354370  |
| C | -4.530704210 | -3.389255500 | -0.429308530 |
| C | -3.980410320 | -3.382796130 | -1.720169450 |
| C | -4.767745400 | -3.733536130 | -2.819741460 |
| C | -6.110087610 | -4.076103780 | -2.643324000 |
| C | -6.667678410 | -4.069522620 | -1.360420610 |
| C | -5.882430830 | -3.733529590 | -0.256152140 |
| C | -4.518994630 | -2.386463700 | 2.323009610  |
| C | -4.990256210 | 0.835206000  | -3.018677850 |
| C | -6.199360330 | 1.334201840  | -3.537937900 |
| C | -6.724481330 | 0.813896760  | -4.721819500 |
| C | -6.045916490 | -0.204614660 | -5.401620370 |
| C | -4.841836450 | -0.697036660 | -4.893775710 |
| C | -4.314405350 | -0.182580520 | -3.705251320 |
| C | -5.480617180 | 1.099541610  | -0.141203510 |
| C | -5.204850000 | 1.571752900  | 1.154351740  |
| C | -6.093828850 | 1.318292840  | 2.199449120  |
| C | -7.260325320 | 0.581845780  | 1.967806740  |

|   |              |              |              |
|---|--------------|--------------|--------------|
| C | -7.523464140 | 0.084057990  | 0.688896830  |
| C | -6.637627040 | 0.336149950  | -0.363246310 |
| C | -4.433440150 | 3.328064520  | -1.644707800 |
| H | 6.059601350  | -3.432275360 | -3.876412950 |
| H | 5.727478330  | -5.594830040 | -5.022194460 |
| H | 3.451403980  | -6.287660260 | -5.766150720 |
| H | 1.494683460  | -4.800053250 | -5.320313010 |
| H | 1.808150720  | -2.643571640 | -4.154423070 |
| H | 4.475167120  | -1.630873740 | -6.122281860 |
| H | 5.075025680  | -0.075457050 | -7.954126140 |
| H | 5.498008490  | 2.333859980  | -7.464670990 |
| H | 5.282353970  | 3.179165080  | -5.127608660 |
| H | 4.653271420  | 1.648701610  | -3.293843530 |
| H | 6.569219450  | -1.501672800 | -2.832025320 |
| H | 5.837453650  | -0.253469560 | -1.774868500 |
| H | 5.597857060  | -1.967530810 | -1.376216630 |
| H | 0.892478830  | -7.723342240 | 0.091489860  |
| H | -0.536448710 | -9.079542350 | -1.394615040 |
| H | -1.694173580 | -8.025521960 | -3.334425470 |
| H | -1.401095720 | -5.576580440 | -3.771790080 |
| H | 0.024186800  | -4.214483910 | -2.296890690 |
| H | 2.911358670  | -6.955467460 | -1.633967980 |
| H | 5.281999600  | -7.557582910 | -2.010010550 |
| H | 7.102501010  | -6.212378660 | -0.964392990 |
| H | 6.523506890  | -4.224660950 | 0.438944810  |
| H | 4.171813570  | -3.595539660 | 0.798616330  |
| H | 1.727934450  | -6.541401170 | 1.805968720  |
| H | 2.090837450  | -4.904949750 | 2.423707170  |
| H | 0.396042510  | -5.358516620 | 2.070741510  |
| H | 2.958839000  | -2.622211940 | 3.525184610  |
| H | 4.969328100  | -3.823589790 | 4.334195060  |
| H | 5.218944390  | -4.357219440 | 6.761797770  |
| H | 3.445733370  | -3.664638410 | 8.371822670  |
| H | 1.425153110  | -2.486658010 | 7.568588700  |
| H | 0.092918290  | -4.291355560 | 6.077028800  |
| H | -1.943979310 | -5.324778870 | 7.035209960  |
| H | -4.101994280 | -4.078145500 | 7.041635330  |
| H | -4.206955690 | -1.782510010 | 6.065481220  |
| H | -2.190077600 | -0.743032420 | 5.090761090  |
| H | 0.501978480  | -0.222026440 | 6.899252320  |
| H | 1.513949990  | 0.520492410  | 5.613056570  |
| H | -0.269544190 | 0.597854980  | 5.493530840  |
| H | 2.837106740  | 3.483372950  | 6.600927270  |
| H | 3.963312980  | 2.270833360  | 8.443028690  |

|   |              |              |              |
|---|--------------|--------------|--------------|
| H | 5.311135500  | 0.227895010  | 7.961014120  |
| H | 5.509958170  | -0.599476190 | 5.612714200  |
| H | 4.380714740  | 0.581676500  | 3.770354630  |
| H | 3.488179100  | 5.755171690  | 4.592647510  |
| H | 2.161622820  | 7.514861190  | 5.709690300  |
| H | -0.262618140 | 7.160803830  | 6.167874230  |
| H | -1.359895160 | 5.029564160  | 5.466172930  |
| H | -0.050494840 | 3.271078730  | 4.321879660  |
| H | 4.840463050  | 4.315068780  | 3.495922710  |
| H | 4.790134010  | 2.943004880  | 2.343218730  |
| H | 3.855894410  | 4.408259270  | 1.980619770  |
| H | -0.697444620 | 5.105554860  | -4.913770370 |
| H | -2.901771590 | 5.962583140  | -5.646125530 |
| H | -4.688644010 | 4.375383030  | -6.362767170 |
| H | -4.255226480 | 1.919527390  | -6.306874050 |
| H | -2.070856390 | 1.052853160  | -5.552697400 |
| H | 1.073203220  | 3.851713780  | -7.070057070 |
| H | 2.685729600  | 5.669619580  | -7.530857700 |
| H | 4.091308190  | 6.598022920  | -5.692728810 |
| H | 3.896487520  | 5.654798390  | -3.383403620 |
| H | 2.319391760  | 3.813347950  | -2.923309310 |
| H | 0.693877310  | 1.378681160  | -6.831249260 |
| H | 1.859812650  | 0.750168430  | -5.616897620 |
| H | 0.177382040  | 0.160200570  | -5.603746760 |
| H | -3.585766180 | -5.771119420 | -0.205223280 |
| H | -2.985617680 | -8.009809260 | 0.651134800  |
| H | -2.055908920 | -8.269571920 | 2.953467420  |
| H | -1.706176520 | -6.248879510 | 4.376344020  |
| H | -2.275176750 | -4.007843270 | 3.524814430  |
| H | -2.935994530 | -3.099905570 | -1.875385690 |
| H | -4.323598290 | -3.728047390 | -3.816647490 |
| H | -6.725774890 | -4.345629280 | -3.504049620 |
| H | -7.717005220 | -4.335636780 | -1.217143740 |
| H | -6.329463480 | -3.749457470 | 0.738964230  |
| H | -5.306722010 | -3.099596040 | 2.599448900  |
| H | -3.898046410 | -2.177497740 | 3.203010380  |
| H | -4.958064830 | -1.440960030 | 1.978507440  |
| H | -6.742843650 | 2.125044180  | -3.017006280 |
| H | -7.666107720 | 1.203263230  | -5.113857430 |
| H | -6.457865290 | -0.609072060 | -6.328679630 |
| H | -4.297703120 | -1.482956410 | -5.421588100 |
| H | -3.365816510 | -0.570559920 | -3.326181600 |
| H | -4.281417240 | 2.115558970  | 1.365925080  |
| H | -7.957607100 | 0.387306660  | 2.785382110  |

|   |              |              |              |
|---|--------------|--------------|--------------|
| H | -8.425486590 | -0.502963270 | 0.503260660  |
| H | -6.852082730 | -0.063842910 | -1.354891970 |
| H | -5.480086700 | 3.626097680  | -1.791316320 |
| H | -4.046842680 | 3.805163650  | -0.734606870 |
| H | -3.831229750 | 3.646547470  | -2.506583810 |
| C | -2.200311990 | 5.685369630  | 0.781673960  |
| C | -2.969940820 | 6.763400000  | 0.309637870  |
| C | -2.648139980 | 4.956172710  | 1.895927600  |
| C | -4.166595690 | 7.104369540  | 0.945521790  |
| H | -2.643792930 | 7.344940850  | -0.554031550 |
| C | -3.842174890 | 5.305420400  | 2.531153420  |
| H | -2.077599370 | 4.099080320  | 2.262749890  |
| C | -4.603395710 | 6.377766550  | 2.057695230  |
| H | -4.758017490 | 7.942112200  | 0.570732270  |
| H | -4.177093840 | 4.723289430  | 3.391989110  |
| H | -5.539505780 | 6.646733620  | 2.551461090  |
| C | 0.664452020  | 6.313265030  | 0.662392930  |
| C | 0.348127320  | 7.428529520  | 1.453218270  |
| C | 2.001911360  | 6.070961060  | 0.303534710  |
| C | 1.358682340  | 8.303986180  | 1.861361340  |
| H | -0.684220680 | 7.616562300  | 1.751980410  |
| C | 3.003230400  | 6.956972770  | 0.706276810  |
| H | 2.276142030  | 5.184635640  | -0.276452830 |
| C | 2.684000940  | 8.076086040  | 1.482291260  |
| H | 1.105264360  | 9.169896410  | 2.476146370  |
| H | 4.037909910  | 6.762867510  | 0.415377910  |
| H | 3.469302920  | 8.766939930  | 1.795896160  |
| C | -0.744891690 | 5.735465180  | -1.754504900 |
| H | 0.205868600  | 5.489695000  | -2.245734170 |
| H | -1.553584850 | 5.190227940  | -2.258088110 |
| H | -0.908892190 | 6.819106540  | -1.826328230 |
| H | -5.857362950 | 1.685799090  | 3.199817490  |

[Au<sub>13</sub>(PPhMe<sub>2</sub>)<sub>10</sub>Cl<sub>2</sub>]<sup>3+</sup> (-1399.90925317 eV)

|    |              |              |              |
|----|--------------|--------------|--------------|
| Au | 2.558170171  | 0.959330025  | -1.193527014 |
| Au | 1.789915399  | -2.069377090 | -1.307487024 |
| Au | 2.530825782  | -0.703561435 | 1.449373557  |
| Au | 1.384552073  | 2.239940203  | 1.443782949  |
| Au | -0.070418471 | 2.686251684  | -1.329321805 |
| Au | 0.143418867  | 0.024052846  | -3.015132385 |
| Au | -0.013048806 | -0.004186325 | -0.000425987 |
| Cl | 4.802234116  | 1.436383176  | -2.243471075 |
| P  | 3.689769336  | -3.377481017 | -2.555235811 |
| C  | 4.119136712  | -5.026031293 | -1.868474690 |

|    |              |              |              |
|----|--------------|--------------|--------------|
| C  | 3.122649121  | -5.759882684 | -1.203581291 |
| C  | 3.387768395  | -7.045802493 | -0.726501672 |
| C  | 4.657288830  | -7.606075553 | -0.893909162 |
| C  | 5.658768764  | -6.877747623 | -1.541697943 |
| C  | 5.392573144  | -5.596858695 | -2.031283726 |
| C  | 3.324185698  | -3.723093355 | -4.330262441 |
| C  | 5.270938181  | -2.439554654 | -2.628701076 |
| P  | 4.983339576  | -1.095807150 | 2.243133423  |
| C  | 5.317113169  | -0.770643121 | 4.017619626  |
| C  | 4.454113766  | -1.346363002 | 4.967024003  |
| C  | 4.682280902  | -1.168689722 | 6.332109519  |
| C  | 5.762759947  | -0.393209883 | 6.765940792  |
| C  | 6.614129373  | 0.196926742  | 5.829534097  |
| C  | 6.398165305  | 0.007248148  | 4.461080280  |
| C  | 5.630076255  | -2.805642141 | 1.981337124  |
| C  | 6.157930585  | -0.040625842 | 1.302872913  |
| P  | 2.586876043  | 4.245332605  | 2.612611531  |
| C  | 3.732844889  | 5.127573599  | 1.486419982  |
| C  | 4.320867118  | 4.396607487  | 0.440002612  |
| C  | 5.236585263  | 5.001317428  | -0.423484856 |
| C  | 5.565660039  | 6.348987489  | -0.254102876 |
| C  | 4.979862439  | 7.087166889  | 0.779312478  |
| C  | 4.070328607  | 6.482136691  | 1.650033005  |
| C  | 1.466287409  | 5.529800578  | 3.312696699  |
| C  | 3.629958965  | 3.793086184  | 4.067756569  |
| P  | 0.238058440  | 5.014996507  | -2.476614206 |
| C  | 1.129660287  | 6.246574001  | -1.430242718 |
| C  | -1.313481132 | 5.899155213  | -2.921140350 |
| P  | 0.400005788  | 0.089433604  | -5.619839559 |
| C  | 2.076225851  | -0.341023693 | -6.228363199 |
| C  | 3.182897537  | 0.117104882  | -5.492266190 |
| C  | 4.481201564  | -0.128982368 | -5.943202636 |
| C  | 4.688386643  | -0.847849197 | -7.124201020 |
| C  | 3.593273283  | -1.320027053 | -7.853287662 |
| C  | 2.291677420  | -1.066716422 | -7.412337970 |
| C  | -0.765905386 | -0.995602820 | -6.544944664 |
| C  | 0.076343504  | 1.751239536  | -6.352674423 |
| Au | -1.396077882 | -2.263673827 | -1.425956141 |
| Au | 0.040224425  | -2.699980964 | 1.316995191  |
| Au | -0.150329209 | -0.034380202 | 3.020122423  |
| Au | -1.784709537 | 2.091523618  | 1.292151633  |
| Au | -2.569469596 | 0.675254531  | -1.438836468 |
| Au | -2.568139222 | -0.935082259 | 1.248266811  |
| P  | -2.703308463 | -4.190344368 | -2.623346814 |

|    |              |              |              |
|----|--------------|--------------|--------------|
| P  | -0.165749451 | -5.027578630 | 2.493220910  |
| P  | -0.340097765 | -0.107399517 | 5.627970427  |
| P  | -3.529610417 | 3.559558482  | 2.576101547  |
| P  | -5.041722609 | 0.711822943  | -2.295843721 |
| Cl | -4.847689436 | -1.271340050 | 2.277215155  |
| C  | -4.191495347 | -4.768381087 | -1.722603809 |
| C  | -1.712771677 | -5.716286964 | -2.932778139 |
| C  | -3.311713329 | -3.766057781 | -4.312960594 |
| C  | -1.012134848 | -6.307802813 | 1.466068896  |
| C  | 1.414107523  | -5.853603887 | 2.950692512  |
| C  | -2.002644017 | 0.310076666  | 6.278929528  |
| C  | 0.846369075  | 0.981454262  | 6.523412146  |
| C  | 0.015168062  | -1.769353635 | 6.346739997  |
| C  | -3.730965864 | 5.298066394  | 2.022371662  |
| C  | -3.209562666 | 3.709699837  | 4.386610403  |
| C  | -5.212799932 | 2.816879872  | 2.510109829  |
| C  | -5.251396626 | 0.280051781  | -4.067930889 |
| C  | -5.926431242 | 2.322723549  | -2.131264690 |
| C  | -6.105275649 | -0.453496206 | -1.358705447 |
| C  | -4.590685638 | -4.090539540 | -0.559980371 |
| C  | -4.953928677 | -5.860356676 | -2.175770800 |
| C  | -3.123046586 | -0.092686311 | 5.531820112  |
| C  | -2.194906123 | 0.968982003  | 7.505177218  |
| C  | -2.730769787 | 5.886601281  | 1.232445707  |
| C  | -4.840278622 | 6.069843303  | 2.407647659  |
| C  | -4.530195002 | 1.020166902  | -5.022314761 |
| C  | -6.094794369 | -0.754242169 | -4.503162546 |
| C  | -5.733013341 | -4.487827719 | 0.140393005  |
| C  | -6.091637335 | -6.259561387 | -1.472696247 |
| C  | -4.413396331 | 0.143640644  | 6.010450028  |
| C  | -3.488033037 | 1.211880520  | 7.975288845  |
| C  | -2.831468067 | 7.225516106  | 0.844054633  |
| C  | -4.943492406 | 7.404123634  | 2.010243308  |
| C  | -4.667995938 | 0.746433506  | -6.383555288 |
| C  | -6.216452445 | -1.037710862 | -5.867449932 |
| C  | -6.483057170 | -5.573793911 | -0.316665389 |
| C  | -4.597315005 | 0.795804005  | 7.233083819  |
| C  | -3.938342163 | 7.984972486  | 1.231417515  |
| C  | -5.509064142 | -0.287695726 | -6.808988107 |
| H  | 2.131096936  | -5.317856680 | -1.064522332 |
| H  | 2.603444320  | -7.618513591 | -0.226808524 |
| H  | 4.866671237  | -8.610234460 | -0.521587496 |
| H  | 6.650958290  | -7.312128501 | -1.676236689 |
| H  | 6.185860767  | -5.050486721 | -2.544777130 |

|   |              |              |              |
|---|--------------|--------------|--------------|
| H | 3.141987197  | -2.774639529 | -4.854795157 |
| H | 2.42932274   | -4.35495469  | -4.400847340 |
| H | 4.169898578  | -4.245599877 | -4.799249197 |
| H | 5.061813206  | -1.396704011 | -2.909346960 |
| H | 5.740907451  | -2.435378815 | -1.636276280 |
| H | 5.966571511  | -2.881075906 | -3.355855685 |
| H | 3.601903601  | -1.945732265 | 4.632427622  |
| H | 4.021364085  | -1.639796348 | 7.062541250  |
| H | 5.944087871  | -0.254406260 | 7.833011172  |
| H | 7.462187123  | 0.797295735  | 6.163511004  |
| H | 7.086940467  | 0.462885742  | 3.748178436  |
| H | 6.697922227  | -2.858524424 | 2.236435710  |
| H | 5.073931636  | -3.507094829 | 2.616642692  |
| H | 5.484059432  | -3.095806943 | 0.931657419  |
| H | 7.202773468  | -0.311321988 | 1.510974468  |
| H | 5.994162740  | 1.015100192  | 1.557334886  |
| H | 5.957168737  | -0.148751935 | 0.227473820  |
| H | 4.066465539  | 3.343699861  | 0.285626185  |
| H | 5.681207518  | 4.409875275  | -1.226269793 |
| H | 6.279764866  | 6.827048350  | -0.926934162 |
| H | 5.237237519  | 8.139252961  | 0.914335976  |
| H | 3.632853892  | 7.076905559  | 2.453876442  |
| H | 2.023669240  | 6.318018446  | 3.837520677  |
| H | 0.788300992  | 5.046600083  | 4.029407161  |
| H | 0.864809799  | 5.980057745  | 2.512365709  |
| H | 4.127405369  | 4.683054378  | 4.478495050  |
| H | 2.999314411  | 3.333901958  | 4.841899279  |
| H | 4.392077344  | 3.065471721  | 3.759501485  |
| H | 0.566509964  | 6.409466408  | -0.500273515 |
| H | 1.237828495  | 7.199017533  | -1.968077717 |
| H | 2.124902656  | 5.858934615  | -1.175392816 |
| H | -1.876634113 | 5.320063042  | -3.664857766 |
| H | -1.931198310 | 5.992855837  | -2.017419641 |
| H | -1.108794660 | 6.903597428  | -3.317988106 |
| H | 3.048046616  | 0.672721404  | -4.559841818 |
| H | 5.326174077  | 0.244189310  | -5.361046011 |
| H | 5.702620560  | -1.039040702 | -7.479392041 |
| H | 3.750182479  | -1.880976065 | -8.776433442 |
| H | 1.452889063  | -1.435209878 | -8.004801011 |
| H | -1.790105406 | -0.759697706 | -6.224232128 |
| H | -0.692607701 | -0.837884789 | -7.630175071 |
| H | -0.556531046 | -2.048993227 | -6.316364327 |
| H | 0.774136304  | 2.481730249  | -5.922676452 |
| H | 0.209419498  | 1.721127113  | -7.443408698 |

|   |              |              |              |
|---|--------------|--------------|--------------|
| H | -0.826464474 | -5.457808851 | -3.528449123 |
| H | -1.385585272 | -6.137861286 | -1.973575330 |
| H | -2.298210553 | -6.472669735 | -3.473986351 |
| H | -3.972115162 | -2.890342758 | -4.259324738 |
| H | -3.864033896 | -4.607468149 | -4.754722677 |
| H | -2.453884506 | -3.521772075 | -4.954902168 |
| H | -1.098000986 | -7.252322866 | 2.021480524  |
| H | -2.016767844 | -5.954431425 | 1.198707614  |
| H | -0.434826317 | -6.473466389 | 0.545212915  |
| H | 1.243827650  | -6.862122542 | 3.353225159  |
| H | 1.950940828  | -5.249685365 | 3.694194258  |
| H | 2.039222358  | -5.931256928 | 2.050483187  |
| H | 0.800925928  | 0.827133563  | 7.610600987  |
| H | 0.630656893  | 2.034050002  | 6.297194870  |
| H | 1.862454794  | 0.744152500  | 6.178434380  |
| H | -0.686446462 | -2.503903559 | 5.930102026  |
| H | 1.040093654  | -2.066507024 | 6.083006134  |
| H | -4.001297007 | 4.300288405  | 4.868900608  |
| H | -3.176011285 | 2.707361479  | 4.836133182  |
| H | -2.245094057 | 4.209763913  | 4.544925189  |
| H | -5.900577800 | 3.305685076  | 3.213948299  |
| H | -5.141614605 | 1.745907977  | 2.752072904  |
| H | -5.610070849 | 2.917851076  | 1.491473262  |
| H | -5.892372501 | 2.643645875  | -1.081108638 |
| H | -6.972721362 | 2.220840268  | -2.451344383 |
| H | -5.431648046 | 3.083914831  | -2.747896440 |
| H | -5.986784257 | -0.256579985 | -0.282991499 |
| H | -7.162346308 | -0.345680526 | -1.640383458 |
| H | -5.778923254 | -1.487117661 | -1.535355085 |
| H | -4.011420850 | -3.238997038 | -0.191067108 |
| H | -4.669170548 | -6.406860250 | -3.077734865 |
| H | -3.004905654 | -0.595282564 | 4.567631869  |
| H | -1.344659871 | 1.294182015  | 8.106821507  |
| H | -1.869103897 | 5.286667872  | 0.923069309  |
| H | -5.632513623 | 5.637205674  | 3.022028751  |
| H | -3.865475791 | 1.826436065  | -4.698076641 |
| H | -6.673359656 | -1.338768176 | -3.786210828 |
| H | -6.025264059 | -3.937933716 | 1.037219510  |
| H | -6.677272618 | -7.108800532 | -1.829176405 |
| H | -5.268917776 | -0.184603165 | 5.416902299  |
| H | -3.627968477 | 1.720652628  | 8.930802847  |
| H | -2.045939358 | 7.682583091  | 0.238320976  |
| H | -5.809789981 | 7.994180743  | 2.314087429  |
| H | -4.126491893 | 1.346161269  | -7.118080155 |



|   |              |              |              |
|---|--------------|--------------|--------------|
| H | -6.882166426 | -1.838491925 | -6.194788891 |
| H | -7.375707796 | -5.889826197 | 0.225970612  |
| H | -5.604848269 | 0.980238166  | 7.610171808  |
| H | -4.020022832 | 9.030022373  | 0.927912302  |
| H | -5.620544574 | -0.500597638 | -7.873471234 |
| C | -1.169957213 | -4.965425437 | 4.025353247  |
| C | -0.807958202 | -5.640342588 | 5.202615817  |
| C | -2.364716431 | -4.223416335 | 3.997297797  |
| C | -1.634597557 | -5.578486624 | 6.328043703  |
| H | 0.111591748  | -6.225113676 | 5.253214772  |
| C | -3.191708215 | -4.173172703 | 5.120210722  |
| H | -2.664251932 | -3.680717071 | 3.095780731  |
| C | -2.826445345 | -4.850103293 | 6.288247669  |
| H | -1.348899293 | -6.112048113 | 7.236271953  |
| H | -4.119659440 | -3.600555430 | 5.076899011  |
| H | -3.472000064 | -4.813000428 | 7.167365222  |
| C | 1.237626317  | 4.943773027  | -4.011575054 |
| C | 0.864518918  | 5.602304719  | -5.194643217 |
| C | 2.437937620  | 4.210766760  | -3.980934458 |
| C | 1.686277267  | 5.534745607  | -6.323504417 |
| H | -0.059517925 | 6.179675559  | -5.247175810 |
| C | 3.258836374  | 4.154292943  | -5.107980697 |
| H | 2.749427810  | 3.680278187  | -3.076361036 |
| C | 2.883657477  | 4.815821823  | -6.281776123 |
| H | 1.392280968  | 6.056741679  | -7.235822856 |
| H | 4.191085758  | 3.588807299  | -5.061941224 |
| H | 3.525572604  | 4.774183228  | -7.163398731 |
| H | -0.951802228 | 2.058222171  | -6.114318931 |
| H | -0.091949427 | -1.745395984 | 7.440493188  |

[Au<sub>12</sub>Pd(PPh<sub>3</sub>)<sub>8</sub>Cl<sub>4</sub>] (-1817.41738061 eV)

|    |              |              |             |
|----|--------------|--------------|-------------|
| Au | 9.868814033  | 15.179331130 | 8.649186644 |
| Au | 9.524514538  | 12.426916000 | 8.066262728 |
| Au | 7.763226352  | 14.528401050 | 6.766309532 |
| Au | 9.196413259  | 17.012143360 | 6.444962191 |
| Au | 12.009278450 | 16.526173500 | 7.341197029 |
| Au | 12.269091710 | 13.681461460 | 8.180661506 |
| Au | 11.541711970 | 11.816235070 | 5.920218294 |
| Au | 8.437350563  | 12.192796240 | 5.431269293 |
| Au | 8.673304757  | 15.516777690 | 4.032193341 |
| Au | 11.265296550 | 16.570333960 | 4.536538081 |
| Au | 13.207010500 | 14.597096420 | 5.527717712 |
| Au | 11.016049690 | 13.929249520 | 3.333361374 |
| Pd | 10.479464430 | 14.257694090 | 6.017776224 |

|    |               |               |               |
|----|---------------|---------------|---------------|
| Cl | 9.241273955   | 15.506501660  | 10.984513470  |
| Cl | 5.440900971   | 14.931727530  | 7.306362489   |
| Cl | 12.457484700  | 9.593845592   | 5.529854605   |
| Cl | 12.207424940  | 18.283168950  | 3.046830202   |
| P  | 11.5598685200 | 13.1683689100 | 1.1909980340  |
| P  | 8.6640280310  | 10.9679526100 | 9.6919201590  |
| P  | 8.0572281150  | 19.0334342800 | 6.8967580070  |
| P  | 13.1716173700 | 18.3078772500 | 8.4085133100  |
| P  | 13.7036878100 | 12.8358159600 | 9.8616992010  |
| P  | 6.9840678930  | 10.5739507800 | 4.6384778220  |
| P  | 7.2085285400  | 16.3821464800 | 2.3824083610  |
| P  | 15.4699950100 | 14.5121816400 | 4.8517846000  |
| C  | 13.1376897500 | 12.2123397800 | 1.1388059440  |
| C  | 13.9976432400 | 12.2351230300 | 0.0287750223  |
| C  | 15.0978962300 | 11.3767829200 | -0.0291859104 |
| C  | 15.3493313400 | 10.4815803000 | 1.0134676480  |
| C  | 14.5113707600 | 10.4693706700 | 2.1313922130  |
| C  | 13.4170089200 | 11.3378489900 | 2.2015816870  |
| C  | 10.4083409200 | 11.9588652000 | 0.3941877561  |
| C  | 10.5412889600 | 10.5794890100 | 0.6287460704  |
| C  | 9.7121565020  | 9.6665377090  | -0.0269991102 |
| C  | 8.7464004330  | 10.1125474200 | -0.9330212239 |
| C  | 8.5894667560  | 11.4833502400 | -1.1479726420 |
| C  | 9.3984340390  | 12.4026811200 | -0.4742167635 |
| C  | 11.7244940300 | 14.4888625000 | -0.0815323765 |
| C  | 11.7725009200 | 15.8193206300 | 0.3539848604  |
| C  | 11.9270319300 | 16.8629303000 | -0.5649418536 |
| C  | 12.0387062700 | 16.5865168100 | -1.9284323200 |
| C  | 11.9812550600 | 15.2610641200 | -2.3759238800 |
| C  | 11.8200193000 | 14.2181415600 | -1.4610212730 |
| C  | 15.6678604100 | 14.8103473500 | 3.0372914150  |
| C  | 16.6128421400 | 14.1304047000 | 2.2513460840  |
| C  | 16.8096090900 | 14.4900520900 | 0.9159653885  |
| C  | 16.0771636200 | 15.5369447800 | 0.3511918320  |
| C  | 15.1231860900 | 16.2040234100 | 1.1226217930  |
| C  | 14.9038828000 | 15.8323179900 | 2.4525049870  |
| C  | 16.2922373000 | 12.8876922700 | 5.1343950070  |
| C  | 17.6819478700 | 12.7014395500 | 4.9890753950  |
| C  | 18.2413018500 | 11.4288340800 | 5.1126866300  |
| C  | 17.4250898500 | 10.3238773100 | 5.3798125820  |
| C  | 16.0494689300 | 10.5004847700 | 5.5347647290  |
| C  | 15.4875247800 | 11.7755725900 | 5.4150443290  |
| C  | 16.6765568300 | 15.7556846800 | 5.5128623740  |
| C  | 16.7035077100 | 17.0520079700 | 4.9712854930  |

|   |               |               |               |
|---|---------------|---------------|---------------|
| C | 17.6584764500 | 17.9787847900 | 5.3922667240  |
| C | 18.6086778500 | 17.6248887300 | 6.3535855880  |
| C | 18.5624885800 | 16.3524936000 | 6.9255142030  |
| C | 17.5915795700 | 15.4299100600 | 6.5256142790  |
| C | 8.5121787240  | 9.2607464990  | 9.0199872350  |
| C | 7.5041833970  | 8.3567434000  | 9.3917502320  |
| C | 7.5027155730  | 7.0569552100  | 8.8789649580  |
| C | 8.4999900840  | 6.6462901990  | 7.9906662100  |
| C | 9.4931051120  | 7.5478364220  | 7.6000765120  |
| C | 9.4969278590  | 8.8480970840  | 8.1081402340  |
| C | 9.5779615390  | 10.7629556600 | 11.2782589600 |
| C | 9.8356468920  | 11.9265178600 | 12.0237164100 |
| C | 10.3297130400 | 11.8248591000 | 13.3244311000 |
| C | 10.5687488500 | 10.5696449300 | 13.8941683600 |
| C | 10.3424261200 | 9.4136444720  | 13.1436969400 |
| C | 9.8535897600  | 9.5063039020  | 11.8361659200 |
| C | 7.0270220310  | 11.4471368000 | 10.3885599600 |
| C | 6.4938917890  | 10.7812801100 | 11.5094482000 |
| C | 5.2761135350  | 11.1875855900 | 12.0553570700 |
| C | 4.5932298300  | 12.2828964300 | 11.5132842000 |
| C | 5.1314669010  | 12.9648771100 | 10.4214101500 |
| C | 6.3421949630  | 12.5467437500 | 9.8599950040  |
| C | 6.6228533440  | 19.4925845100 | 5.8302598060  |
| C | 5.5114744160  | 18.6318982000 | 5.8035642460  |
| C | 4.3341028570  | 19.0392621600 | 5.1731204290  |
| C | 4.2511253690  | 20.2968730000 | 4.5666042510  |
| C | 5.3627340210  | 21.1415795300 | 4.5697526470  |
| C | 6.5467578670  | 20.7400328700 | 5.1940224460  |
| C | 9.1908812530  | 20.4689723000 | 6.7049410330  |
| C | 9.2033169680  | 21.5855386800 | 7.5551855810  |
| C | 10.0504205800 | 22.6639227500 | 7.2823538640  |
| C | 10.8874500300 | 22.6431227200 | 6.1624110390  |
| C | 10.8884000900 | 21.5267825400 | 5.3208440070  |
| C | 10.0506642300 | 20.4450743900 | 5.5927935250  |
| C | 7.2428136010  | 19.1697616700 | 8.5399429310  |
| C | 6.3584027180  | 20.2261908200 | 8.8328092130  |
| C | 5.7001502560  | 20.2683882600 | 10.0613546900 |
| C | 5.8962339720  | 19.2484111700 | 11.0012033400 |
| C | 6.7576113300  | 18.1921994400 | 10.7079791600 |
| C | 7.4312753710  | 18.1558168800 | 9.4838837190  |
| C | 12.0686366500 | 19.3042951700 | 9.4968580130  |
| C | 11.1464419800 | 18.6076423300 | 10.2952603800 |
| C | 10.372206840  | 19.288234710  | 11.238554790  |
| C | 10.496245410  | 20.671820530  | 11.383787230  |

|   |              |              |              |
|---|--------------|--------------|--------------|
| C | 11.389052210 | 21.374655580 | 10.569562070 |
| C | 12.172548980 | 20.697805370 | 9.631449864  |
| C | 14.539647300 | 17.878249290 | 9.583948140  |
| C | 14.317430550 | 17.747335290 | 10.964539690 |
| C | 15.386916400 | 17.538573770 | 11.839780500 |
| C | 16.693283590 | 17.467310770 | 11.351302070 |
| C | 16.918255730 | 17.563965990 | 9.975471621  |
| C | 15.850542380 | 17.745558460 | 9.093896869  |
| C | 14.031271430 | 19.516519410 | 7.317061174  |
| C | 13.823423600 | 19.449161990 | 5.935823596  |
| C | 14.481057540 | 20.335416740 | 5.075366800  |
| C | 15.348997280 | 21.300087320 | 5.588854537  |
| C | 15.564666910 | 21.375813340 | 6.970338428  |
| C | 14.917615760 | 20.486914010 | 7.829484095  |
| C | 13.619425480 | 13.652131060 | 11.510884030 |
| C | 14.605792880 | 13.432199270 | 12.492730890 |
| C | 14.508119090 | 14.046937590 | 13.741091180 |
| C | 13.431137820 | 14.893455820 | 14.025867430 |
| C | 12.452089930 | 15.117713610 | 13.055847440 |
| C | 12.545442460 | 14.500030360 | 11.803913100 |
| C | 13.398954270 | 11.045477000 | 10.177089630 |
| C | 13.540452230 | 10.455784070 | 11.442885190 |
| C | 13.449679850 | 9.069431828  | 11.585256890 |
| C | 13.217554920 | 8.256473328  | 10.472070980 |
| C | 13.053349370 | 8.839349412  | 9.213949560  |
| C | 13.135979510 | 10.226725150 | 9.068407324  |
| C | 15.531906460 | 12.815272310 | 9.560614858  |
| C | 16.186343250 | 11.659101340 | 9.106025423  |
| C | 17.577529070 | 11.634804160 | 8.979260054  |
| C | 18.336203060 | 12.758638730 | 9.315407195  |
| C | 17.688973370 | 13.921935980 | 9.742433743  |
| C | 16.296706340 | 13.958590710 | 9.847971349  |
| C | 5.831974525  | 11.056520670 | 3.278892389  |
| C | 4.460726517  | 11.271715500 | 3.488328495  |
| C | 3.615577161  | 11.549148260 | 2.410071029  |
| C | 4.126267134  | 11.606436250 | 1.112480791  |
| C | 5.495229967  | 11.414101570 | 0.901758777  |
| C | 6.348021701  | 11.158410880 | 1.975844847  |
| C | 7.790147067  | 9.086692240  | 3.920802141  |
| C | 7.067859962  | 8.150266796  | 3.154962948  |
| C | 7.717750176  | 7.046302013  | 2.601515809  |
| C | 9.093792600  | 6.870486976  | 2.793449085  |
| C | 9.815023612  | 7.798155525  | 3.548008990  |
| C | 9.165283822  | 8.901513373  | 4.110991637  |

|   |              |              |              |
|---|--------------|--------------|--------------|
| C | 5.837773591  | 9.975560553  | 5.941717202  |
| C | 5.209166683  | 10.930806670 | 6.760761908  |
| C | 4.238337621  | 10.532050490 | 7.682554988  |
| C | 3.900609983  | 9.182129980  | 7.812991850  |
| C | 4.549936287  | 8.227045968  | 7.025629842  |
| C | 5.511905301  | 8.619069250  | 6.092541950  |
| C | 7.471201341  | 18.193177170 | 2.153747186  |
| C | 8.795425468  | 18.656141790 | 2.198103709  |
| C | 9.098742632  | 19.978124310 | 1.861840729  |
| C | 8.080111143  | 20.857884050 | 1.490838880  |
| C | 6.755630741  | 20.411902370 | 1.476476948  |
| C | 6.448540034  | 19.090234400 | 1.808517162  |
| C | 5.405816613  | 16.144015390 | 2.666253559  |
| C | 4.449831669  | 16.487093060 | 1.688826043  |
| C | 3.089469760  | 16.312508540 | 1.939931077  |
| C | 2.664337470  | 15.779277880 | 3.162842026  |
| C | 3.606221618  | 15.419384720 | 4.127172267  |
| C | 4.971597344  | 15.600968570 | 3.880994158  |
| C | 7.350180968  | 15.824106330 | 0.616335699  |
| C | 8.167499184  | 16.500512260 | -0.304630799 |
| C | 8.136171784  | 16.164455700 | -1.660927443 |
| C | 7.282673502  | 15.158592640 | -2.120499278 |
| C | 6.497697500  | 14.452988230 | -1.203438220 |
| C | 6.545856450  | 14.767716700 | 0.156231110  |
| H | 13.819265030 | 12.927092850 | -0.793288982 |
| H | 15.757146430 | 11.407554740 | -0.899689660 |
| H | 16.204642160 | 9.804283472  | 0.959571354  |
| H | 14.699546340 | 9.787295467  | 2.961694656  |
| H | 12.779960530 | 11.317283010 | 3.090217015  |
| H | 11.309632550 | 10.207006150 | 1.306651473  |
| H | 9.830961075  | 8.598574215  | 0.166051057  |
| H | 9.260201739  | 13.468861040 | -0.655498139 |
| H | 11.696517920 | 16.051749180 | 1.418096383  |
| H | 11.960096540 | 17.890395930 | -0.195930458 |
| H | 12.165861360 | 17.400669840 | -2.646010552 |
| H | 12.055939710 | 15.038710470 | -3.442657543 |
| H | 11.755456770 | 13.191713920 | -1.824930075 |
| H | 17.197136590 | 13.312624460 | 2.670945349  |
| H | 17.543728460 | 13.947153560 | 0.316668851  |
| H | 16.240168140 | 15.823089520 | -0.690197450 |
| H | 14.528510760 | 17.011582480 | 0.694667933  |
| H | 14.131793550 | 16.351667470 | 3.025757179  |
| H | 18.332407000 | 13.550569320 | 4.777065321  |
| H | 19.320455610 | 11.302906140 | 4.996101375  |

|   |              |              |              |
|---|--------------|--------------|--------------|
| H | 17.865248220 | 9.328135721  | 5.466496050  |
| H | 15.387656470 | 9.656825840  | 5.742126039  |
| H | 14.406911290 | 11.892196630 | 5.530577302  |
| H | 15.991210480 | 17.341962320 | 4.198565051  |
| H | 17.662735880 | 18.979218990 | 4.956550088  |
| H | 19.374654370 | 18.340652070 | 6.659790557  |
| H | 19.291782910 | 16.064042710 | 7.686423593  |
| H | 17.569784270 | 14.446248510 | 6.992175266  |
| H | 6.708855864  | 8.666414610  | 10.069437600 |
| H | 6.712112621  | 6.363702517  | 9.174336056  |
| H | 8.494640845  | 5.629229923  | 7.593414284  |
| H | 10.266666980 | 7.253909282  | 6.887889641  |
| H | 10.266427720 | 9.548861745  | 7.776663818  |
| H | 9.622721488  | 12.913747400 | 11.603605910 |
| H | 10.517326470 | 12.733890830 | 13.898495000 |
| H | 10.935680570 | 10.496362860 | 14.920292540 |
| H | 10.537268060 | 8.430696224  | 13.577035470 |
| H | 9.669649616  | 8.598803779  | 11.260042040 |
| H | 7.044391198  | 9.964014431  | 11.978098830 |
| H | 4.870406428  | 10.658923170 | 12.920547840 |
| H | 3.650401658  | 12.610355850 | 11.956130860 |
| H | 4.627236016  | 13.831792060 | 9.990622635  |
| H | 6.753304939  | 13.102121170 | 9.015991749  |
| H | 5.550650995  | 17.655546660 | 6.295607036  |
| H | 3.474084011  | 18.367176480 | 5.160987873  |
| H | 3.323016589  | 20.613173000 | 4.086281791  |
| H | 5.314486636  | 22.122360190 | 4.091761254  |
| H | 7.405312759  | 21.411652770 | 5.201077449  |
| H | 8.561316660  | 21.613425430 | 8.436277327  |
| H | 10.054842430 | 23.527290820 | 7.951549911  |
| H | 11.548391850 | 23.487008650 | 5.954040515  |
| H | 11.549990510 | 21.481333650 | 4.454006185  |
| H | 10.077062810 | 19.571837740 | 4.937466547  |
| H | 6.162388520  | 21.004654870 | 8.092602989  |
| H | 5.016531426  | 21.091782790 | 10.278990420 |
| H | 5.363686964  | 19.273804250 | 11.954620480 |
| H | 6.917336037  | 17.375870560 | 11.414933610 |
| H | 8.091665177  | 17.315458530 | 9.267886767  |
| H | 11.015803800 | 17.527130230 | 10.188860730 |
| H | 9.663271867  | 18.722014350 | 11.844644840 |
| H | 9.888321754  | 21.203238580 | 12.118837920 |
| H | 11.479649970 | 22.460229310 | 10.661559350 |
| H | 13.310027700 | 17.834360600 | 11.370216290 |
| H | 15.194932450 | 17.449543220 | 12.910805920 |

|   |              |              |              |
|---|--------------|--------------|--------------|
| H | 17.531246450 | 17.333139010 | 12.038834890 |
| H | 17.932545730 | 17.507645260 | 9.577042629  |
| H | 16.049045660 | 17.822079780 | 8.024233553  |
| H | 13.152506790 | 18.700129110 | 5.511784165  |
| H | 14.302142530 | 20.252143110 | 4.001103879  |
| H | 15.862210530 | 21.991873940 | 4.916861842  |
| H | 16.246033480 | 22.124556700 | 7.380542664  |
| H | 15.117697250 | 20.536762260 | 8.900935820  |
| H | 15.458906180 | 12.787993780 | 12.277940440 |
| H | 15.279640630 | 13.864413220 | 14.492980710 |
| H | 13.360695360 | 15.375617930 | 15.003316380 |
| H | 11.601146480 | 15.771707390 | 13.257452740 |
| H | 11.763923790 | 14.686654440 | 11.064066510 |
| H | 13.716073730 | 11.073244820 | 12.323102330 |
| H | 13.556473300 | 8.624348617  | 12.576220510 |
| H | 13.153744020 | 7.171699218  | 10.587201810 |
| H | 12.856886390 | 8.229386674  | 8.330483701  |
| H | 12.998107310 | 10.661895790 | 8.076310666  |
| H | 15.614930190 | 10.761491020 | 8.872135171  |
| H | 18.068769800 | 10.724351430 | 8.631758991  |
| H | 19.426125920 | 12.728282510 | 9.242922301  |
| H | 18.268034620 | 14.810037020 | 10.002006230 |
| H | 15.810826220 | 14.872979990 | 10.188263270 |
| H | 4.041247488  | 11.204175170 | 4.491723540  |
| H | 2.548596893  | 11.702409010 | 2.586714539  |
| H | 3.461071846  | 11.800727570 | 0.268591294  |
| H | 5.909232087  | 11.454902990 | -0.106314210 |
| H | 7.414103505  | 11.008182750 | 1.791798614  |
| H | 5.998470302  | 8.288205881  | 2.981925719  |
| H | 7.148533460  | 6.325608481  | 2.009974151  |
| H | 9.602199491  | 6.012129456  | 2.348138217  |
| H | 10.891002900 | 7.689976355  | 3.704187928  |
| H | 9.746799414  | 9.623839061  | 4.688589946  |
| H | 5.468882278  | 11.990178780 | 6.683490062  |
| H | 3.758338243  | 11.285439420 | 8.308703110  |
| H | 3.142011234  | 8.874835395  | 8.536578444  |
| H | 4.306768064  | 7.167665763  | 7.130957869  |
| H | 6.008703150  | 7.863595755  | 5.484060584  |
| H | 9.610035485  | 17.990830790 | 2.491562503  |
| H | 10.140493800 | 20.301591190 | 1.900642193  |
| H | 8.313696564  | 21.890707600 | 1.224666919  |
| H | 5.948524171  | 21.098007220 | 1.210742496  |
| H | 5.407806568  | 18.770320830 | 1.805877744  |
| H | 4.766459971  | 16.874386340 | 0.720476049  |

|   |              |              |              |
|---|--------------|--------------|--------------|
| H | 2.359827492  | 16.588133200 | 1.174583461  |
| H | 1.597049849  | 15.642953600 | 3.354721040  |
| H | 3.301787648  | 14.998108000 | 5.086752533  |
| H | 5.688892821  | 15.315470000 | 4.653377741  |
| H | 8.809715720  | 17.317357580 | 0.023476495  |
| H | 8.770093880  | 16.710096710 | -2.362548491 |
| H | 7.233206072  | 14.924899140 | -3.185919562 |
| H | 5.829067003  | 13.659955050 | -1.546164226 |
| H | 5.917804203  | 14.212911650 | 0.853668983  |
| H | 8.117762884  | 9.394460641  | -1.463684957 |
| H | 7.838068893  | 11.849280500 | -1.850909505 |
| H | 12.854900600 | 21.265259330 | 8.999258972  |

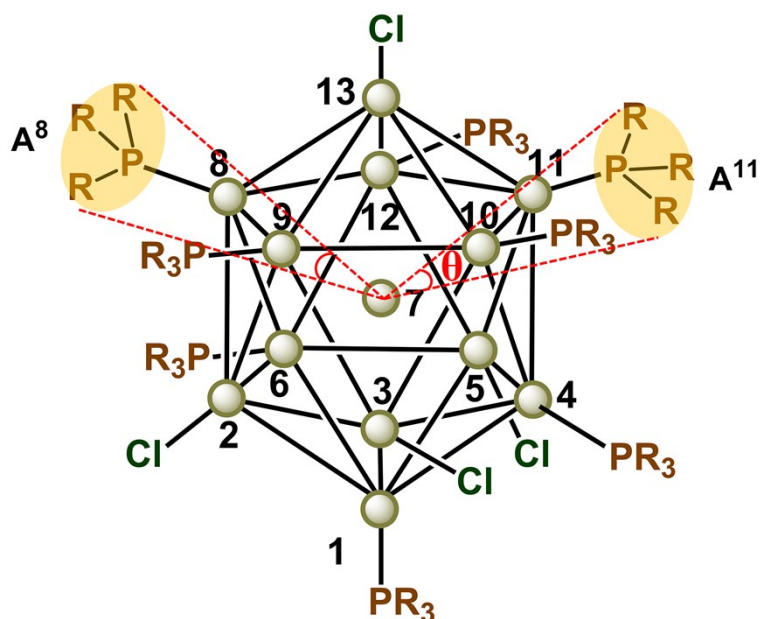

Figure S1: The diagram of cone angel  $\theta$  of  $\text{PR}_3$  ligands. The cone angle of the phosphine ligand connected to  $\text{M}^x$  is designated as  $\text{A}^x$ .

Table S1. The cone angel  $\theta$  of  $\text{PR}_3$  ligands in  $\text{M}_{13}$  NCs.

|     | Cone Angel ( $^\circ$ ) |              |              |              |              |              |              |              |                 |                 |                 |         |
|-----|-------------------------|--------------|--------------|--------------|--------------|--------------|--------------|--------------|-----------------|-----------------|-----------------|---------|
|     | $\text{A}^1$            | $\text{A}^2$ | $\text{A}^3$ | $\text{A}^4$ | $\text{A}^5$ | $\text{A}^6$ | $\text{A}^8$ | $\text{A}^9$ | $\text{A}^{10}$ | $\text{A}^{11}$ | $\text{A}^{12}$ | Average |
| NC0 | 46.4                    |              |              | 46.1         |              | 46.6         | 46.9         | 48.0         | 46.0            | 46.5            | 46.5            | 46.7    |
| NC1 |                         | 61.5         | 58.3         | 59.5         | 61.4         | 61.7         | 59.6         | 61.3         | 61.5            | 62.6            | 58.5            | 60.9    |
| NC2 | 76.2                    |              |              | 76.1         |              | 74.0         | 73.5         | 71.0         | 76.7            | 74.8            | 76.7            | 74.7    |
| NC3 | 79.1                    |              |              | 71.5         |              | 78.5         | 77.8         | 79.3         | 76.3            | 71.4            | 80.0            | 76.4    |
